# Supplementary figures and images for: Stabilization of Beeswax-In-Water Dispersions Using Anionic Cellulose Nanofibers and Their Application in Paper Coating
Source: MDPI journal article supplement (doi:10.3390/nano13162353), 2023-08-16

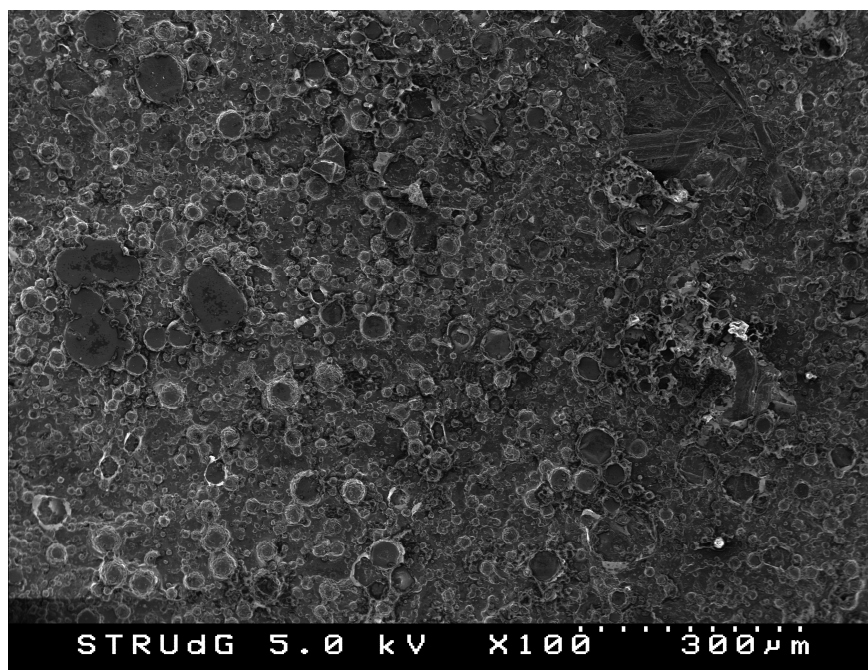

Figure S1: SEM image of the surface of a sheet coated with BW (20 wt%)/glycerol (1 wt%)/TOCNF-15 (0.9 wt%)/water

Supplement: s1 [file s1]
